# Supplementary material for: Bruchid Infestation Was Associated With Agronomic Traits in Field-grown Faba Bean Genotypes
Source: Springer Nature journal article supplement (doi:10.1007/s10343-024-00972-2), 2024-02-26
Supplement: MOESM1 [file 26788690]

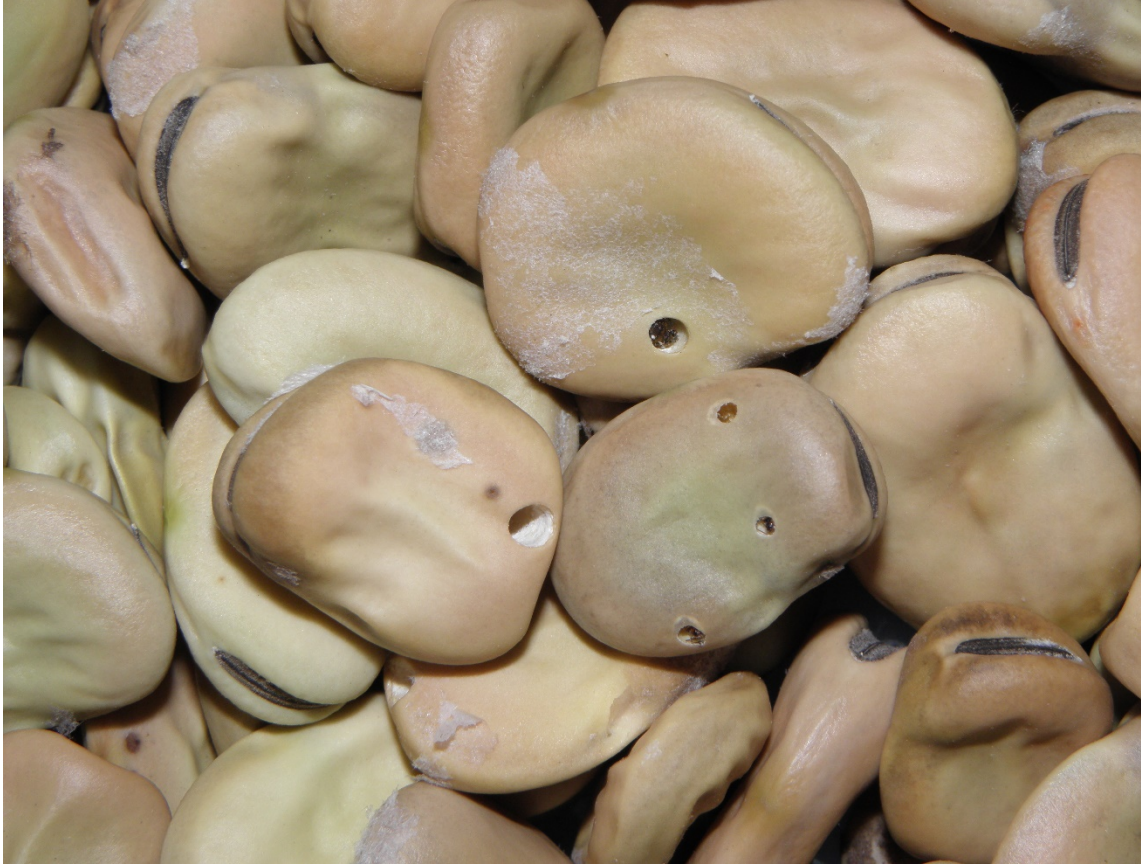

**Fig. 1S.** Single emergence holes of adult *Bruchus rufimanus* and triple emergence holes of adult endoparasitoid *Triaspis thoracica* on seeds of a *Vicia faba* var. *major* accession.
