# Supplementary material for: Bruchid Infestation Was Associated With Agronomic Traits in Field-grown Faba Bean Genotypes
Source: Springer Nature journal article supplement (doi:10.1007/s10343-024-00972-2), 2024-02-26
Supplement: MOESM2 [file 26788690]

**Table 1S.** Coefficients (r) and significance level for the correlations between the determined traits [BpP: branches per plant, PH: plant height, PpP: pods per plant, SpP: seeds per pod, HSW: 100-seed weight, SY: seed yield per plant, HI: harvest index,  $L^*$ ,  $a^*$ ,  $b^*$ : testa color parameters, Prot: seed protein concentration, SPC: seed protein content, TPhe: total phenolic compounds, TTan: total tannins, BD: percentage of bruchid holes, PD: percentage of parasitoid holes, and BI: bruchid-infestation level (BI = BD + PD)] in 10 *Vicia faba* accessions tested across two years (n = 10).

|                         | PH              | PpP    | SpP                 | HSW                  | SY     | HI     | $L^*$                | $a^*$  | $b^*$    | Prot   | SPC      | TPhe | TTan | BD      | PD     | BI       |
|-------------------------|-----------------|--------|---------------------|----------------------|--------|--------|----------------------|--------|----------|--------|----------|------|------|---------|--------|----------|
| <b>BpP</b>              | ns <sup>a</sup> | 0.91** | -0.69* <sup>b</sup> | -0.81** <sup>c</sup> | ns     | -0.71* | -0.82**              | -0.69* | -0.82**  | ns     | -0.81**  | ns   | ns   | -0.73*  | ns     | -0.76**  |
| <b>PH</b>               |                 | ns     | ns                  | ns                   | ns     | ns     | ns                   | ns     | ns       | ns     | ns       | ns   | ns   | ns      | ns     | ns       |
| <b>PpP</b>              |                 |        | -0.81**             | -0.96***             | -0.74* | ns     | -0.92***             | -0.74* | -0.93*** | 0.64*  | -0.96*** | ns   | ns   | -0.87** | -0.73* | -0.91*** |
| <b>SpP</b>              |                 |        |                     | 0.80**               | 0.73*  | ns     | 0.80**               | ns     | 0.79**   | ns     | 0.81**   | ns   | ns   | 0.82**  | 0.74*  | 0.88***  |
| <b>HSW</b>              |                 |        |                     |                      | 0.78** | ns     | 0.91*** <sup>d</sup> | 0.75*  | 0.93***  | ns     | ns       | ns   | ns   | 0.87**  | 0.76*  | 0.92***  |
| <b>SY</b>               |                 |        |                     |                      |        | ns     | ns                   | ns     | ns       | ns     | 0.79**   | ns   | ns   | ns      | ns     | 0.67*    |
| <b>HI</b>               |                 |        |                     |                      |        |        | ns                   | ns     | ns       | ns     | ns       | ns   | ns   | ns      | ns     | ns       |
| <b><math>L^*</math></b> |                 |        |                     |                      |        |        |                      | ns     | 1.00***  | -0.64* | 0.90***  | ns   | ns   | 0.86**  | 0.74*  | 0.91***  |
| <b><math>a^*</math></b> |                 |        |                     |                      |        |        |                      |        | 0.72*    | ns     | 0.72*    | ns   | ns   | ns      | ns     | ns       |
| <b><math>b^*</math></b> |                 |        |                     |                      |        |        |                      |        |          | -0.63* | 0.91***  | ns   | ns   | 0.87**  | 0.74*  | 0.92***  |
| <b>Prot</b>             |                 |        |                     |                      |        |        |                      |        |          |        | §        | ns   | ns   | ns      | ns     | ns       |
| <b>SPC</b>              |                 |        |                     |                      |        |        |                      |        |          |        |          | ns   | ns   | 0.86**  | 0.80** | 0.94***  |
| <b>TPhe</b>             |                 |        |                     |                      |        |        |                      |        |          |        |          |      | §    | ns      | ns     | ns       |
| <b>TTan</b>             |                 |        |                     |                      |        |        |                      |        |          |        |          |      |      | ns      | ns     | ns       |
| <b>BD</b>               |                 |        |                     |                      |        |        |                      |        |          |        |          |      |      |         | ns     | §        |
| <b>PD</b>               |                 |        |                     |                      |        |        |                      |        |          |        |          |      |      |         |        | §        |

<sup>a</sup> not significant

<sup>b</sup> significant at 0.05 level

<sup>c</sup> significant at 0.01 level

<sup>d</sup> significant at 0.001 level

§ not estimated to avoid spurious self-correlation
